# Supplementary material
Source: HighWire-hosted journal article supplement (https://bmjopen.bmj.com/content/12/7/e059380)
Supplement: inline-supplementary-material-1 [file inline-supplementary-material-1.pdf]

| Construct                                                                                                    | Item Content                                                                                                                      | Variable Code                                                                | Choices, Calculations, OR Slider Labels                                                                                                                                                     | Branching Logic                    |
|--------------------------------------------------------------------------------------------------------------|-----------------------------------------------------------------------------------------------------------------------------------|------------------------------------------------------------------------------|---------------------------------------------------------------------------------------------------------------------------------------------------------------------------------------------|------------------------------------|
| <b>Pain Attitudes and Beliefs Musculoskeletal (PABS-MSK) Questionnaire - Biomedical</b>                      | Pain is a nociceptive stimulus, indicating tissue damage                                                                          | pabs_med_1 (randomized to Q17)                                               | 1, Totally disagree   2, Largely disagree   3, Disagree to some extent   4, Agree to some extent   5, Largely agree   6, Totally agree                                                      |                                    |
|                                                                                                              | Patients with musculoskeletal pain should preferably practice only pain free movements                                            | pabs_med_2 (randomized to Q7)                                                | 1, Totally disagree   2, Largely disagree   3, Disagree to some extent   4, Agree to some extent   5, Largely agree   6, Totally agree                                                      |                                    |
|                                                                                                              | Musculoskeletal pain indicates the presence of organic injury                                                                     | pabs_med_3 (randomized to Q18)                                               | 1, Totally disagree   2, Largely disagree   3, Disagree to some extent   4, Agree to some extent   5, Largely agree   6, Totally agree                                                      |                                    |
|                                                                                                              | If musculoskeletal pain increases in severity, I immediately adjust the intensity of treatment accordingly                        | pabs_med_4 (randomized to Q2)                                                | 1, Totally disagree   2, Largely disagree   3, Disagree to some extent   4, Agree to some extent   5, Largely agree   6, Totally agree                                                      |                                    |
|                                                                                                              | If therapy does not result in a reduction in pain, there is a high risk of severe restrictions in the long term                   | pabs_med_5 (randomized to Q6)                                                | 1, Totally disagree   2, Largely disagree   3, Disagree to some extent   4, Agree to some extent   5, Largely agree   6, Totally agree                                                      |                                    |
|                                                                                                              | Pain reduction is a precondition for the restoration of normal functioning                                                        | pabs_med_6 (randomized to Q16)                                               | 1, Totally disagree   2, Largely disagree   3, Disagree to some extent   4, Agree to some extent   5, Largely agree   6, Totally agree                                                      |                                    |
|                                                                                                              | Increased pain indicates new tissue damage or the spread of existing damage                                                       | pabs_med_7 (randomized to Q3)                                                | 1, Totally disagree   2, Largely disagree   3, Disagree to some extent   4, Agree to some extent   5, Largely agree   6, Totally agree                                                      |                                    |
|                                                                                                              | If patients complain of pain during exercise, I worry that damage is being caused                                                 | pabs_med_8 (randomized to Q9)                                                | 1, Totally disagree   2, Largely disagree   3, Disagree to some extent   4, Agree to some extent   5, Largely agree   6, Totally agree                                                      |                                    |
|                                                                                                              | The severity of tissue damage determines the level of pain                                                                        | pabs_med_9 (randomized to Q11)                                               | 1, Totally disagree   2, Largely disagree   3, Disagree to some extent   4, Agree to some extent   5, Largely agree   6, Totally agree                                                      |                                    |
|                                                                                                              | In the long run, patients with musculoskeletal pain have a higher risk of developing functional impairments                       | pabs_med_10 (randomized to Q15)                                              | 1, Totally disagree   2, Largely disagree   3, Disagree to some extent   4, Agree to some extent   5, Largely agree   6, Totally agree                                                      |                                    |
| <b>Pain Attitudes and Beliefs Musculoskeletal (PABS-MSK) Questionnaire - Biopsychosocial</b>                 | Biological, psychological and social factors should be included in the clinical assessment                                        | pabs_biopsyc_1 (randomized to Q19)                                           | 1, Totally disagree   2, Largely disagree   3, Disagree to some extent   4, Agree to some extent   5, Largely agree   6, Totally agree                                                      |                                    |
|                                                                                                              | How a patient currently copes with their pain problem must be assessed                                                            | pabs_biopsyc_2 (randomized to Q13)                                           | 1, Totally disagree   2, Largely disagree   3, Disagree to some extent   4, Agree to some extent   5, Largely agree   6, Totally agree                                                      |                                    |
|                                                                                                              | The reaction of a patient's family and friends will promote recovery                                                              | pabs_biopsyc_3 (randomized to Q5)                                            | 1, Totally disagree   2, Largely disagree   3, Disagree to some extent   4, Agree to some extent   5, Largely agree   6, Totally agree                                                      |                                    |
|                                                                                                              | A patient's beliefs about the cause of their musculoskeletal pain must be understood                                              | pabs_biopsyc_4 (randomized to Q1)                                            | 1, Totally disagree   2, Largely disagree   3, Disagree to some extent   4, Agree to some extent   5, Largely agree   6, Totally agree                                                      |                                    |
|                                                                                                              | Specific and realistic goals for treatment must be agreed                                                                         | pabs_biopsyc_5 (randomized to Q4)                                            | 1, Totally disagree   2, Largely disagree   3, Disagree to some extent   4, Agree to some extent   5, Largely agree   6, Totally agree                                                      |                                    |
|                                                                                                              | A patients perceived barriers to work must be assessed                                                                            | pabs_biopsyc_6 (randomized to Q10)                                           | 1, Totally disagree   2, Largely disagree   3, Disagree to some extent   4, Agree to some extent   5, Largely agree   6, Totally agree                                                      |                                    |
|                                                                                                              | A patient's expectations about treatment for musculoskeletal pain affect their outcome                                            | pabs_biopsyc_7 (randomized to Q14)                                           | 1, Totally disagree   2, Largely disagree   3, Disagree to some extent   4, Agree to some extent   5, Largely agree   6, Totally agree                                                      |                                    |
|                                                                                                              | I consider a patient's social support network in my clinical management                                                           | pabs_biopsyc_8 (randomized to Q20)                                           | 1, Totally disagree   2, Largely disagree   3, Disagree to some extent   4, Agree to some extent   5, Largely agree   6, Totally agree                                                      |                                    |
|                                                                                                              | A patient's physical activity level should be considered in the management of their musculoskeletal pain problem                  | pabs_biopsyc_9 (randomized to Q12)                                           | 1, Totally disagree   2, Largely disagree   3, Disagree to some extent   4, Agree to some extent   5, Largely agree   6, Totally agree                                                      |                                    |
|                                                                                                              | Reducing a patient's fear is essential to the treatment process                                                                   | pabs_biopsyc_10 (randomized to Q8)                                           | 1, Totally disagree   2, Largely disagree   3, Disagree to some extent   4, Agree to some extent   5, Largely agree   6, Totally agree                                                      |                                    |
| <b>Digitalization of clinics</b>                                                                             | Do you use an electronic patient record (EPR) system for clinical record keeping in your practice?                                | epr_use                                                                      | 1, Yes. I use only an EPR system   2, Partially. I use a mix of an EPR and paper   3, No. I use a paper-based system, but am considering switching   4, No. I use only a paper-based system | [epr_use] = '1' or [epr_use] = '2' |
|                                                                                                              | Please indicate the Manufacturer Name and Product Name for the EPR information system that you use in practice.                   | epr_manu_prod                                                                |                                                                                                                                                                                             | [epr_use] = '3'                    |
|                                                                                                              | Please indicate the Manufacturer Name and Product Name for the EPR information system that you are considering to use in practice | epr_manu_prod_considering                                                    |                                                                                                                                                                                             | [secure_email_use] = '1'           |
|                                                                                                              | Do you use a secure/encrypted email system for patient communication in your practice (e.g., HIN or ProtonMail)?                  | secure_email_use                                                             | 1, Yes   2, No                                                                                                                                                                              |                                    |
|                                                                                                              | Please indicate the Product Name for the secure/encrypted email system you use in practice.                                       | email_manu_prod                                                              |                                                                                                                                                                                             |                                    |
|                                                                                                              | How would you compare your quality of life now, when compared to before the COVID-19 pandemic?                                    | cov_clin_1                                                                   | 1, Better   2, Similar   3, Worsened                                                                                                                                                        |                                    |
|                                                                                                              | How have your patient numbers been affected since the start of the COVID-19 pandemic?                                             | cov_clin_2                                                                   | 1, Increased   2, Unchanged   3, Decreased                                                                                                                                                  |                                    |
| Have you changed your work hours since the start of the COVID-19 pandemic?                                   | cov_clin_3                                                                                                                        | 1, Increased   2, Unchanged   3, Decreased                                   |                                                                                                                                                                                             |                                    |
| Does your clinic offer telehealth/virtual care services?                                                     | cov_clin_4                                                                                                                        | 1, Yes   2, No   3, No, but I am considering integrating it into my practice |                                                                                                                                                                                             |                                    |
| How has patient use of telehealth or virtual care services changed since the start of the COVID-19 pandemic? | telehealth                                                                                                                        | 1, Increased use   2, Unchanged   3, Decreased use                           | [cov_clin_4] = '1'                                                                                                                                                                          |                                    |
| <b>Motivation for sub-study involvement</b>                                                                  | On a scale from 0 to 100 how motivated are you to participate in the patient cohort phase of the Swiss ChiCo study?               | motivation                                                                   | 0 (not motivated at all)   100 (highly motivated)                                                                                                                                           |                                    |
