# Supplementary material
Source: HighWire-hosted journal article supplement (https://bmjopen.bmj.com/content/12/7/e059380)
Supplement: inline-supplementary-material-2 [file inline-supplementary-material-2.pdf]

## Supplementary material 2. Patient-reported variables captured in the Swiss ChiCo pilot patient cohort

| Construct                                                                                                    | Item Content                                                                                                                                                                                                                                                                                                                                                                                                                                                                                                                                                                                                                                                                                                                                                                                                                                                                                                                                                                                                                                                                                                                                                                                                                                                                                                                                                                                                                                                                                                                                                                                                                                                                                                                                                                                                                                                                                                                                                                                                                                                                                                                                                                                                                                                                                                                                                                                                          | Variable Code                                                                                                                                                                                                                                                                                                                                                                                                                                                                                                                                                                                                                                                                                                                                                                                                                                                                                                                                                                                                                                                                                                                                                                                                                                                                                                      | Choices, Calculations, OR Slider Labels                                                                                                                                                                                                                                                                                                                                                                                                                                                                                                                                                                                                                                                                                                                                                                                                                                                                                                                                                                                                                                                                                                                                                                                                                                                                              | Branching Logic                                                                      |
|--------------------------------------------------------------------------------------------------------------|-----------------------------------------------------------------------------------------------------------------------------------------------------------------------------------------------------------------------------------------------------------------------------------------------------------------------------------------------------------------------------------------------------------------------------------------------------------------------------------------------------------------------------------------------------------------------------------------------------------------------------------------------------------------------------------------------------------------------------------------------------------------------------------------------------------------------------------------------------------------------------------------------------------------------------------------------------------------------------------------------------------------------------------------------------------------------------------------------------------------------------------------------------------------------------------------------------------------------------------------------------------------------------------------------------------------------------------------------------------------------------------------------------------------------------------------------------------------------------------------------------------------------------------------------------------------------------------------------------------------------------------------------------------------------------------------------------------------------------------------------------------------------------------------------------------------------------------------------------------------------------------------------------------------------------------------------------------------------------------------------------------------------------------------------------------------------------------------------------------------------------------------------------------------------------------------------------------------------------------------------------------------------------------------------------------------------------------------------------------------------------------------------------------------------|--------------------------------------------------------------------------------------------------------------------------------------------------------------------------------------------------------------------------------------------------------------------------------------------------------------------------------------------------------------------------------------------------------------------------------------------------------------------------------------------------------------------------------------------------------------------------------------------------------------------------------------------------------------------------------------------------------------------------------------------------------------------------------------------------------------------------------------------------------------------------------------------------------------------------------------------------------------------------------------------------------------------------------------------------------------------------------------------------------------------------------------------------------------------------------------------------------------------------------------------------------------------------------------------------------------------|----------------------------------------------------------------------------------------------------------------------------------------------------------------------------------------------------------------------------------------------------------------------------------------------------------------------------------------------------------------------------------------------------------------------------------------------------------------------------------------------------------------------------------------------------------------------------------------------------------------------------------------------------------------------------------------------------------------------------------------------------------------------------------------------------------------------------------------------------------------------------------------------------------------------------------------------------------------------------------------------------------------------------------------------------------------------------------------------------------------------------------------------------------------------------------------------------------------------------------------------------------------------------------------------------------------------|--------------------------------------------------------------------------------------|
| <b>Reasons for non-participation</b><br>Collected at in-clinic recruitment                                   | Record ID<br>Are you interested in participating in this study?<br><br>Reasons for not participating<br>Other reason for not participating<br>For clinic staff only                                                                                                                                                                                                                                                                                                                                                                                                                                                                                                                                                                                                                                                                                                                                                                                                                                                                                                                                                                                                                                                                                                                                                                                                                                                                                                                                                                                                                                                                                                                                                                                                                                                                                                                                                                                                                                                                                                                                                                                                                                                                                                                                                                                                                                                   | record_id<br>chico_interest<br><br>nonparticipation<br>nonparticipation_other<br>clinic_disrup                                                                                                                                                                                                                                                                                                                                                                                                                                                                                                                                                                                                                                                                                                                                                                                                                                                                                                                                                                                                                                                                                                                                                                                                                     | 1, Yes   2, No<br>1, No email address   2, Unfamiliar with electronic or internet tools   3, Lack of time   4, Lack of interest in the study   5, Data privacy concerns   6, Other<br><br>1, Disruption to clinic workflow                                                                                                                                                                                                                                                                                                                                                                                                                                                                                                                                                                                                                                                                                                                                                                                                                                                                                                                                                                                                                                                                                           | [chico_interest] = '2'<br>[nonparticipation(6)] = '1'<br>[nonparticipation(6)] = '1' |
| <b>Pain, enjoyment and general activity (PEG) scale</b><br>Collected at baseline, 1 hour, 2-, 6-, and 12-wks | What number best describes your pain on average in the past week?<br>What number best describes how, during the past week, pain has interfered with your enjoyment of life?<br>What number best describes how, during the past week, pain has interfered with your general activity?                                                                                                                                                                                                                                                                                                                                                                                                                                                                                                                                                                                                                                                                                                                                                                                                                                                                                                                                                                                                                                                                                                                                                                                                                                                                                                                                                                                                                                                                                                                                                                                                                                                                                                                                                                                                                                                                                                                                                                                                                                                                                                                                  | peg_q1_bforetex / peg_q1 / peg_q1_2wks / peg_q1_6wks / peg_q1_12wks<br>peg_q2_bforetex / peg_q2 / peg_q2_2wks / peg_q2_6wks / peg_q2_12wks<br>peg_q3_bforetex / peg_q3 / peg_q3_2wks / peg_q3_6wks / peg_q3_12wks                                                                                                                                                                                                                                                                                                                                                                                                                                                                                                                                                                                                                                                                                                                                                                                                                                                                                                                                                                                                                                                                                                  | 1, 0 = No pain   2, 1   3, 2   4, 3   5, 4   6, 5   7, 6   8, 7   9, 8   10, 9   11, 10 = Pain as bad as you can imagine<br>1, 0 = Does not interfere   2, 1   3, 2   4, 3   5, 4   6, 5   7, 6   8, 7   9, 8   10, 9   11, 10 = Completely interferes<br>1, 0 = Does not interfere   2, 1   3, 2   4, 3   5, 4   6, 5   7, 6   8, 7   9, 8   10, 9   11, 10 = Completely interferes                                                                                                                                                                                                                                                                                                                                                                                                                                                                                                                                                                                                                                                                                                                                                                                                                                                                                                                                 |                                                                                      |
| <b>Musculoskeletal health questionnaire (MSK-HQ)</b><br>Collected at baseline, 1 hour, 2-, 6-, and 12-wks    | 1. Pain/stiffness during the day<br>How severe was your usual joint or muscle pain and/or stiffness overall during the day in the last 2 weeks<br>2. Pain/stiffness during the night<br>How severe was your usual joint or muscle pain and/or stiffness overall during the night in the last 2 weeks?<br>3. Walking<br>How much have your symptoms interfered with your ability to walk in the last 2 weeks?<br>4. Washing/Dressing<br>How much have your symptoms interfered with your ability to wash or dress yourself in the last 2 weeks?<br>5. Physical activity levels<br>How much has it been a problem for you to do physical activities (e.g. going for a walk or jogging) to the level you want because of your joint or muscle symptoms in the last 2 weeks?<br>6. Work/daily routine<br>How much have your joint or muscle symptoms interfered with your work or daily routine in the last 2 weeks (including work & jobs around the house)?<br>7. Social activities and hobbies<br>How much have your joint or muscle symptoms interfered with your social activities and hobbies in the last 2 weeks?<br>8. Needing Help<br>How often have you needed help from others (including family, friends or carers) because of your joint or muscle symptoms in the last 2 weeks?<br>9. Sleep<br>How often have you had trouble with either falling asleep or staying asleep because of your joint or muscle symptoms in the last 2 weeks?<br>10. Fatigue or low energy<br>How much fatigue or low energy have you felt in the last 2 weeks?<br>11. Emotional well-being<br>How much have you felt anxious or low in your mood because of your joint or muscle symptoms in the last 2 weeks?<br>12. Understanding of your condition and any current treatment<br>Thinking about your joint or muscle symptoms, how well do you feel you understand your condition and any current treatment (including your diagnosis and medication)?<br>13. Confidence in being able to manage your symptoms<br>How confident have you felt in being able to manage your joint or muscle symptoms by yourself in the last 2 weeks (e.g. medication, changing lifestyle)?<br>14. Overall Impact<br>How much have your joint or muscle symptoms bothered you overall in the last 2 weeks?<br>Physical activity Levels<br>In the past week, on how many days have you done a total of 30 minutes or more of physical activity. | mskhq_q1_bforetex / mskhq_q1 / mskhq_q1_2wks / mskhq_q1_6wks / mskhq_q1_12wks<br>mskhq_q2_bforetex / mskhq_q2 / mskhq_q2_2wks / mskhq_q2_6wks / mskhq_q2_12wks<br>mskhq_q3_bforetex / mskhq_q3 / mskhq_q3_2wks / mskhq_q3_6wks / mskhq_q3_12wks<br>mskhq_q4_bforetex / mskhq_q4 / mskhq_q4_2wks / mskhq_q4_6wks / mskhq_q4_12wks<br>mskhq_q5_bforetex / mskhq_q5 / mskhq_q5_2wks / mskhq_q5_6wks / mskhq_q5_12wks<br>mskhq_q6_bforetex / mskhq_q6 / mskhq_q6_2wks / mskhq_q6_6wks / mskhq_q6_12wks<br>mskhq_q7_bforetex / mskhq_q7 / mskhq_q7_2wks / mskhq_q7_6wks / mskhq_q7_12wks<br>mskhq_q8_bforetex / mskhq_q8 / mskhq_q8_2wks / mskhq_q8_6wks / mskhq_q8_12wks<br>mskhq_q9_bforetex / mskhq_q9 / mskhq_q9_2wks / mskhq_q9_6wks / mskhq_q9_12wks<br>mskhq_q10_bforetex / mskhq_q10 / mskhq_q10_2wks / mskhq_q10_6wks / mskhq_q10_12wks<br>mskhq_q11_bforetex / mskhq_q11 / mskhq_q11_2wks / mskhq_q11_6wks / mskhq_q11_12wks<br>mskhq_q12_bforetex / mskhq_q12 / mskhq_q12_2wks / mskhq_q12_6wks / mskhq_q12_12wks<br>mskhq_q13_bforetex / mskhq_q13 / mskhq_q13_2wks / mskhq_q13_6wks / mskhq_q13_12wks<br>mskhq_q14_bforetex / mskhq_q14 / mskhq_q14_2wks / mskhq_q14_6wks / mskhq_q14_12wks<br>mskhq_activity_bforetex / mskhq_activity / mskhq_activity_2wks / mskhq_activity_6wks / mskhq_activity_12wks | 1, Not at all   2, Slightly   3, Moderately   4, Fairly severe   5, Very severe<br><br>1, Not at all   2, Slightly   3, Moderately   4, Fairly severe   5, Very severe<br><br>1, Not at all   2, Slightly   3, Moderately   4, Severely   5, Unable to walk<br><br>1, Not at all   2, Slightly   3, Moderately   4, Severely   5, Unable to wash or dress myself<br><br>1, Not at all   2, Slightly   3, Moderately   4, Very much   5, Unable to do physical activities<br><br>1, Not at all   2, Slightly   3, Moderately   4, Severely   5, Extremely<br><br>1, Not at all   2, Slightly   3, Moderately   4, Severely   5, Extremely<br><br>1, Not at all   2, Rarely   3, Sometimes   4, Frequently   5, All the time<br><br>1, Not at all   2, Rarely   3, Sometimes   4, Frequently   5, Every night<br><br>1, Not at all   2, Slight   3, Moderate   4, Severe   5, Extreme<br><br>1, Not at all   2, Slightly   3, Moderately   4, Severely   5, Extremely<br><br>1, Completely   2, Very well   3, Moderately   4, Slightly   5, Not at all<br><br>1, Extremely   2, Very   3, Moderately   4, Slightly   5, Not at all<br><br>1, Not at all   2, Slightly   3, Moderately   4, Very much   5, Extremely<br><br>1, None   2, 1 day   3, 2 days   4, 3 days   5, 4 days   6, 5 days   7, 6 days   8, 7 days |                                                                                      |

| Construct                                                                  | Item Content                                                                                                                                                                                                                                                                                                                                                                                                                                                                                                                                                           | Variable Code                                                                                                                                                               | Choices, Calculations, OR Slider Labels                                                                                                                                                                                                                                                                                                                                                                                                                                                                                                                                                                                                  | Branching Logic                                                                                                                                                                                                                          |
|----------------------------------------------------------------------------|------------------------------------------------------------------------------------------------------------------------------------------------------------------------------------------------------------------------------------------------------------------------------------------------------------------------------------------------------------------------------------------------------------------------------------------------------------------------------------------------------------------------------------------------------------------------|-----------------------------------------------------------------------------------------------------------------------------------------------------------------------------|------------------------------------------------------------------------------------------------------------------------------------------------------------------------------------------------------------------------------------------------------------------------------------------------------------------------------------------------------------------------------------------------------------------------------------------------------------------------------------------------------------------------------------------------------------------------------------------------------------------------------------------|------------------------------------------------------------------------------------------------------------------------------------------------------------------------------------------------------------------------------------------|
| <b>Brief illness perception (IPQ brief)</b><br>Collected at baseline       | Please list in rank-order the three most important factors that you believe caused your current pain complaint<br>1<br>2<br>3                                                                                                                                                                                                                                                                                                                                                                                                                                          | briefillness<br>ipq_q1<br>ipq_q2<br>ipq_q3                                                                                                                                  |                                                                                                                                                                                                                                                                                                                                                                                                                                                                                                                                                                                                                                          |                                                                                                                                                                                                                                          |
| <b>Demographics</b><br>Collected 1 hour after initial assessment           | Sex<br><br>Nationality<br>Highest level of education<br>At present, are you working<br><br>How would you describe the total physical strain caused by your work?<br>Have you missed any days of work due to your current pain complaint?<br>How many days of sick leave have you had in the last 2 weeks ?<br>Smoking Status<br>How much do you smoke on average per day?<br>Have you visited a chiropractor before?                                                                                                                                                   | sex_p<br><br>nationality<br>education<br>Job<br><br>workstrain<br>sick_leave<br>n_sickleave<br>smoking<br>n_cigarettes<br>newpatient                                        | 1, Male   2, Female<br><br>1, Swiss   2, Non-Swiss<br>1, Compulsory   2, Secondary   3, Tertiary<br>1, Full time at your usual job   2, Full time at a lighter job   3, Part time   4, Not working - disability   5, Not working - IV/pensioner applicant<br>  6, Housewife/Househusband   7, Retired (not disability)   8, Unemployed   9, Student<br><br>1, Very light   2, Light   3, Somewhat strenuous   4, Strenuous   5, Very strenuous<br>1, Yes   2, No<br><br>1, Current smoker   2, Previous smoker   3, Never smoker<br><br>1, I am new to chiropractic   2, I have visited a chiropractor before                            | [job] = '1' or [job] = '2' or [job] = '3' or [job] = '6' or [job] = '9'<br><br>[sick_leave] = '1'<br><br>[smoking] = '1'                                                                                                                 |
| <b>Injury Characteristics</b><br>Collected 1 hour after initial assessment | Have you visited a medical doctor for your current pain complaint?<br><br>Were you referred to chiropractic care for your pain complaint from a healthcare professional?<br><br>Which healthcare professional referred you to chiropractic care?<br>Please specify which healthcare professional referred you to chiropractic care.<br><br>How long has it been since your current pain complaint began?<br>Main location of pain complaint<br><br>Please specify the main location of your pain complaint<br>Are you currently taking medication to reduce your pain? | md_currentpain<br><br>referral_source<br><br>hcrefer_specify<br>hc_refer_other<br><br>date_of_inj<br>pain_complaint<br><br>pain_complaint_other<br>medication               | 1, Yes   2, No<br><br>1, Yes   2, No<br><br>1, Other chiropractor   2, Family practitioner   3, Internist   4, Orthopaedic surgeon   5, Physical therapist   6, Massage therapist   7, Other<br><br>1, 1-2 days   2, 3-7 days   3, 1-2 weeks   4, 2-4 weeks   5, 1-3 months   6, 4-12 months   7, More than 12 months<br>1, Low back pain   2, Low back pain with leg pain   3, Neck pain   4, Neck pain with arm pain   5, Middle back pain   6, Headache   7, Shoulder pain   8, Hip pain   9, Knee pain   10, Pain in multiple areas   11, Other<br><br>1, Yes, prescription medication   2, Yes, non-prescription medication   3, No | [referral_source] = '1'<br>[hcrefer_specify] = '7'<br><br>[pain_complaint] = '11'                                                                                                                                                        |
| <b>Imaging Use</b><br>Collected 1 hour after initial assessment            | In the last 1 month have you received any diagnostic imaging for your current pain complaint?<br><br>X ray (radiography) in the last 1 month?<br>Ultrasound scan in the last 1 month?<br>MRI scan in the last 1 month?<br>CT scan in the last 1 month?<br>In the last 1 year have you received diagnostic imaging for any pain complaint?<br>X-ray (radiography) in the last 1 year?<br>Ultrasound scan in the last 1 year?<br>MRI scan in the last 1 year?<br>CT scan in the last 1 year?                                                                             | image_postvisit<br><br>xray_postvisit<br>ultra_postvisit<br>mri_postvisit<br>ctscan_postvisit<br>imaging1y_postvisit<br>xray_1yr<br>ultrasound_1yr<br>mri_1yr<br>ctscan_1yr | 1, Yes   2, No<br><br>1, Yes   2, No   3, Unsure<br>1, Yes   2, No<br>1, Yes   2, No   3, Unsure<br>1, Yes   2, No   3, Unsure<br>1, Yes   2, No   3, Unsure<br>1, Yes   2, No   3, Unsure                                                                                                                                                                                                                                                                                                                                                     | [image_postvisit] = '1'<br>[image_postvisit] = '1'<br>[image_postvisit] = '1'<br>[image_postvisit] = '1'<br><br>[imaging1y_postvisit] = '1'<br>[imaging1y_postvisit] = '1'<br>[imaging1y_postvisit] = '1'<br>[imaging1y_postvisit] = '1' |
| <b>COVID-19 aspects</b><br>Collected 1 hour after initial assessment       | How is your quality of life at the moment compared to the time before the COVID-19 pandemic?<br>How are your physical activity habits at the moment compared to the time before the COVID-19 pandemic?<br>Have you been unable to seek planned or necessary medical treatment because of the COVID-19 pandemic?<br>What treatment could you not participate in because of the COVID-19 pandemic?<br>Would you be interested in receiving virtual or telehealth chiropractic sessions?                                                                                  | patient_cov_1<br><br>pat_cov_2<br><br>pat_cov_3<br>pat_cov_4<br>virtual                                                                                                     | 1, Better   2, Similar   3, Worsened<br><br>1, Better   2, Similar   3, Worsened<br><br>1, Yes   2, No<br><br>1, Yes   2, No   3, Unsure                                                                                                                                                                                                                                                                                                                                                                                                                                                                                                 | [pat_cov_3] = '1'                                                                                                                                                                                                                        |

| Construct                                                                                                                                | Item Content                                                                                                               | Variable Code                                                                 | Choices, Calculations, OR Slider Labels                                                                                                                                | Branching Logic                                                     |
|------------------------------------------------------------------------------------------------------------------------------------------|----------------------------------------------------------------------------------------------------------------------------|-------------------------------------------------------------------------------|------------------------------------------------------------------------------------------------------------------------------------------------------------------------|---------------------------------------------------------------------|
| <b>Orebro Musculoskeletal Pain Screening Questionnaire - Short</b><br>Collected 1 hour after initial assessment                          | How long have you had your current pain complaint?                                                                         | omps_q1                                                                       | 1, 0-1 weeks   2, 2-3 weeks   3, 4-5 weeks   4, 6-7 weeks   5, 8-9 weeks   6, 10-11 weeks   7, 12-23 weeks   8, 24-35 weeks   9, 36-52 weeks   10, > 52 weeks          |                                                                     |
|                                                                                                                                          | How would you rate the pain that you have had during the past week?                                                        | omps_q2                                                                       | 1, 0 = No pain   2, 1   3, 2   4, 3   5, 4   6, 5   7, 6   8, 7   9, 8   10, 9   11, 10 = Pain as bad as it could be                                                   |                                                                     |
|                                                                                                                                          | How tense or anxious have you felt in the past week?                                                                       | omps_q5                                                                       | 1, 0 = Absolutely calm and relaxed   2, 1   3, 2   4, 3   5, 4   6, 5   7, 6   8, 7   9, 8   10, 9   11, 10 = As tense and anxious as I've ever felt                   |                                                                     |
|                                                                                                                                          | How much have you been bothered by feeling depressed in the past week?                                                     | omps_q6                                                                       | 1, 0 = Not at all   2, 1   3, 2   4, 3   5, 4   6, 5   7, 6   8, 7   9, 8   10, 9   11, 10 = Extremely                                                                 |                                                                     |
|                                                                                                                                          | In your view, how large is the risk that your current pain may become persistent?                                          | omps_q7                                                                       | 1, 0 = No risk   2, 1   3, 2   4, 3   5, 4   6, 5   7, 6   8, 7   9, 8   10, 9   11, 10 = Very large risk                                                              |                                                                     |
|                                                                                                                                          | In your estimation, what are the chances you will be working your normal duties in 3 months?                               | omps_q8                                                                       | 1, 0 = No chance   2, 1   3, 2   4, 3   5, 4   6, 5   7, 6   8, 7   9, 8   10, 9   11, 10 = Very large chance                                                          |                                                                     |
|                                                                                                                                          | An increase in pain is an indication that I should stop what I'm doing until the pain decreases.                           | omps_q9                                                                       | 1, 0 = Completely disagree   2, 1   3, 2   4, 3   5, 4   6, 5   7, 6   8, 7   9, 8   10, 9   11, 10 = Completely agree                                                 |                                                                     |
|                                                                                                                                          | I should not do my normal work with my present pain.                                                                       | omps_q10                                                                      | 1, 0 = Completely disagree   2, 1   3, 2   4, 3   5, 4   6, 5   7, 6   8, 7   9, 8   10, 9   11, 10 = Completely agree                                                 |                                                                     |
|                                                                                                                                          | I can do light work for an hour                                                                                            | omps_q3                                                                       | 1, 0 = Can't do it because of the pain problem   2, 1   3, 2   4, 3   5, 4   6, 5   7, 6   8, 7   9, 8   10, 9   11, 10 = Can do it without pain being a problem       |                                                                     |
|                                                                                                                                          | I can sleep at night.                                                                                                      | omps_q4                                                                       | 1, 0 = Can't do it because of the pain problem   2, 1   3, 2   4, 3   5, 4   6, 5   7, 6   8, 7   9, 8   10, 9   11, 10 = Can do it without pain being a problem       |                                                                     |
| <b>Follow-up Questionnaire: injury characteristics and imaging use</b><br>Collected at 2-, 6-, and 12-wks                                | In the last 2 wks / 4 wks / 6 wks have you had any follow-up visits with the chiropractor for your pain complaint?         | fu_chiro_2wks / fu_chiro_6wks / fu_chiro_12wks                                | 1, Yes   2, No                                                                                                                                                         | [fu_chiro_2wks] / [fu_chiro_6wks] / [fu_chiro_12wks] = '1'          |
| How many times have you seen your chiropractor in the last 2 wks / 4 wks / 6 wks?                                                        | nfu_chiro_2wks / nfu_chiro_6wks / nfu_chiro_12wks                                                                          | 1, Once   2, 2-4 times   3, More than 4 times                                 |                                                                                                                                                                        |                                                                     |
| In the last 2 wks / 4 wks / 6 wks have you visited another healthcare professional other than your chiropractor for your pain complaint? | hc_2wks / hc_6wks / hc_12wks<br>nfu_otherhealth_2wks / nfu_otherhealth_6wks / nfu_otherhealth_12wks                        | 1, Yes   2, No                                                                |                                                                                                                                                                        | [hc_2wks] / [hc_6wks] / [hc_12wks] = '1'                            |
| How many times have you visited another healthcare professional in the last 2 wks / 4 wks / 6 wks?                                       | nfu_otherhealth_12wks                                                                                                      | 1, Once   2, 2-4 times   3, More than 4 times                                 |                                                                                                                                                                        | [hc_2wks] / [hc_6wks] / [hc_12wks] = '1'                            |
| Medical doctor visit in the last 2 wks / 4 wks / 6 wks for your pain complaint?                                                          | gp_2wks / gp_6wks / gp_12wks                                                                                               | 1, Yes   2, No                                                                |                                                                                                                                                                        | [hc_2wks] / [hc_6wks] / [hc_12wks] = '1'                            |
| Physiotherapist visit in the last 2 wks / 4 wks / 6 wks for your pain complaint?                                                         | physo_2wks / physo_6wks / physo_12wks                                                                                      | 1, Yes   2, No                                                                |                                                                                                                                                                        | [hc_2wks] / [hc_6wks] / [hc_12wks] = '1'                            |
| Other healthcare professional seen in the last 2 wks / 4 wks / 6 wks for your pain complaint?                                            | otherhealth_2wks / otherhealth_6wks / otherhealth_12wks                                                                    | 1, Yes   2, No                                                                |                                                                                                                                                                        | [hc_2wks] / [hc_6wks] / [hc_12wks] = '1'                            |
| Which other healthcare professional did you see?                                                                                         | specif_otherhealth_2wks / specif_otherhealth_6wks / specif_otherhealth_12wks                                               |                                                                               |                                                                                                                                                                        | [otherhealth_2wks] / [otherhealth_6wks] / [otherhealth_12wks] = '1' |
| Are you currently taking medication to reduce your pain?                                                                                 | medication_2wks / medication_6wks / medication_12wks                                                                       | 1, Yes, prescription medication   2, Yes, non-prescription medication   3, No |                                                                                                                                                                        |                                                                     |
| Have you missed any days of work due to your pain complaint in the last 2 wks / 4 wks / 6 wks?                                           | sickleave_2wks / sickleave_6wks / sickleave_12wks                                                                          | 1, Yes   2, No                                                                |                                                                                                                                                                        | [sickleave_2wks] / [sickleave_6wks] / [sickleave_12wks] = '1'       |
| How many days of sick leave have you had in the last 2 wks / 4 wks / 6 wks due to your pain complaint?                                   | n_sickleave_2wks / n_sickleave_6wks / n_sickleave_12wks                                                                    |                                                                               |                                                                                                                                                                        |                                                                     |
| In the last 2 wks / 4 wks / 6 wks have you received any diagnostic imaging for your pain complaint?                                      | imaging_2wks / imaging_6wks / imaging_12wks                                                                                | 1, Yes   2, No                                                                |                                                                                                                                                                        | [imaging_2wks] / [imaging_6wks] / [imaging_12wks] = '1'             |
| X-Ray (radiography) in the last 2 wks / 4 wks / 6 wks                                                                                    | xray_2wks / xray_6wks / xray_12wks                                                                                         | 1, Yes   2, No   3, Unsure                                                    |                                                                                                                                                                        | [imaging_2wks] / [imaging_6wks] / [imaging_12wks] = '1'             |
| Ultrasound scan in the last 2 wks / 4 wks / 6 wks                                                                                        | ultra_2wks / ultra_6wks / ultra_12wks                                                                                      | 1, Yes   2, No   3, Unsure                                                    |                                                                                                                                                                        | [imaging_2wks] / [imaging_6wks] / [imaging_12wks] = '1'             |
| MRI scan in the last 2 wks / 4 wks / 6 wks                                                                                               | mri_2wks / mri_6wks / mri_12wks                                                                                            | 1, Yes   2, No   3, Unsure                                                    |                                                                                                                                                                        | [imaging_2wks] / [imaging_6wks] / [imaging_12wks] = '1'             |
| CT scan in the last 2 wks / 4 wks / 6 wks                                                                                                | ct_2wks / ct_6wks / ct_12wks                                                                                               | 1, Yes   2, No   3, Unsure                                                    |                                                                                                                                                                        | [imaging_2wks] / [imaging_6wks] / [imaging_12wks] = '1'             |
| <b>Patients' Global Impression of Change (PGIC) scale</b><br>Collected at 2-, 6-, and 12-wks                                             | To what extent has your pain complaint changed when compared with the situation just before you started chiropractic care? | pgic_q1_2wks / pgic_q1_6wks / pgic_q1_12wks                                   | 1, 1. Completely recovered   2, 2. Much improved   3, 3. Slightly improved   4, 4. Not changed   5, 5. Slightly worsened   6, 6. Much worsened   7, 7. Worse than ever |                                                                     |
